# Supplementary material for: The preparation and structures of non-hydrocarbon functionalised fullerene–diamine adducts
Source: Royal Society of Chemistry journal article supplement (doi:10.1039/b303952h), 2003-01-01
Supplement: b303952h.doc [file b303952h.doc]

### Supplemental data

**General Notes**

Photochemical experiments were conducted using an unfiltered medium pressure mercury lamp surrounded by a quartz water jacket, which was immersed in the reaction solution. All photochemical reaction solutions and reagents were purged extensively with nitrogen immediately before photolysis. Methylpiperazine **1a** (Avocado Chemicals), *trans*-2,5-dimethyl-piperazine **1f** (Avocado Chemicals) and piperazine **1h** (Lancaster Chemicals) were purified by sublimation prior to use. MALDI mass spectra were obtained with Bruker Reflex III MALDI-TOF Mass Spectrometer.Nuclear Magnetic Resonance spectroscopy was performed on aBrucker DRX400 (100.6 MHz)

**2-Hydroxymethyl-piperazine 1b**

A solution of 1-4-dibenzyl-2-(hydroxymethyl)-piperazine (1 g, 3.3 mmol, see below for preparation) in ethanol (10 mL) was treated with 10% Pd/C under an H2 atmosphere overnight at room temperature. The mixture was filtered through celite before removing the solvent *in vacuo*, to give 392 mg (95%) of the title compound as an off-white powder The material was used in the next step without purification. m.p. 95-96 C; 1H NMR (300 MHz)  3.38 (2H, dd, J = 2.2 and 7.0), 2.94-2.68 (7H, m), 2.45 (1H, t, J 7Hz) 13C NMR (75 MHz)  46.7 (2CH2), 49.0 (CH2), 57.6 (CH), 64.4 (CH2). Spectroscopic data was in line with that previously reported.1

**1-4-Dibenzyl-2-(hydroxymethyl) piperazine**

Prepared by modification to the literature procedure of Rondu *et al*:[[1]](#endnote-2)A stirred suspension of LiAlH4 (7.5g, 22 mmol) in dry ether (30 mL) was cooled to 0 C, and 3.34 g (88 mmol) of ethyl 1,4-dibenzylpiperazine-2-carboxylate (see below for preparation) in ether (30 mL) was added slowly. The mixture was stirred overnight at room temperature, then cooled to 0 C and treated carefully with aqueous sodium hydrogen carbonate. The solution was extracted with CH2Cl2 (250 mL), and the organic extract was dried over MgSO4. After the solvent was removed, recrystallization of the crude product from ethyl acetate:hexane afforded 5.8 g (88%) of the title compound as a white powder. mp 72-73 C; 1H NMR (300 MHz)  7.36-7.2 (10H, m, Ar-H), 4.06 (1H, dd, J  11.15 and 2.89 Hz),3.95 (1H, d, J  13.2 Hz), 3.59 (1H, dd, J  11.15 and 2.89 Hz), 3.48 (1H, d, J  13.2 Hz), 3.78 (1H, br s), 3.47 (2H, s), 2.95-2.92 (1H, m), 2.69-2.31 (6H, m); 13C NMR (75 MHz)  50.2 (CH2), 52.8 (CH2), 56.4 (CH2), 58.4 (CH2), 58.9 (CH), 62.5 (CH2), 63.6 (CH2), 127.0-129.1 (C-H Ar), 137.6 (C Ar) 138.4 (C Ar). Spectroscopic data was in line with that previously reported.1

**Ethyl 1-4-Dibenzyl-2-piperazinecarboxylate**

Prepared according to the procedure used by Rondu et al:13.67 mL of ethyl 2,3-dibromopropionate (25 mmol) was added dropwise to a hot (80 C) toluene solution (75 ml) of *N, N’*-dibenzylethylenediamine 6g (24 mmol), 8.36 mL (60 mmol) of triethylamine. The reaction mixture was refluxed overnight and then cooled. The reaction mixture was washed with aqueous sodium hydrogen carbonate (250 mL) and brine (150 mL). The organic layer was dried over MgSO4 and the solvent removed in vacuo to give a red oil which was purified by column chromatography using petroleum ether: ethyl acetate (9:1) as eluent, to give 7.66g (90%) of the title compound as a colorless oil.1H NMR (300 MHz),  4.12 (2H, q, J  7 Hz), 3.84 (1H, d, J 13.1 Hz), 3.52-3.58 (2H, m), 3.35 (1H,d, J = 12.8 Hz), 3.23 (1H, dd, J = 11.8 Hz, J = 6.5 Hz), 2.99 (1H, m), 2.65-2.24 (5H, m); 13C NMR (75 MHz),  14.6 (CH3), 49 (CH2), 53.4 (CH2), 55.9 (CH2), 60.0 (CH2), 60.8 (CH2), 63.0 (CH2), 63.2 (CH), 127.4-129.5 (CH), 138.3 (C), 138.5 (C), 172.5 (C=O). Spectroscopic data was in line with that previously reported.1

***2-Hexoxymethyl-piperazine 1c***

A solution of 1,4-Dibenzyl-2-hexoxymethyl-piperazine (1g, 2.8mmol, see below for preparation) in ethanol (10 mL) was treated with 10% Pd/C under an H2 atmosphere overnight at room temperature. The mixture was filtered through celite before removing the solvent *in vacuo*, to give 480 mg (91%) of the title compound as a waxy white solid. The material was used in the next step without purification. 1H NMR (CDCl3, 300 MHz)  0.87 (3H, t, J 6.9 Hz), 1.20-1.34 (6H, m), 1.53 (2H, p, J 6.6 Hz), 2.61 (1H, dd, J 1.3 Hz, 11.2 Hz), 2.84 (1H, m), 3.01-3.16 (5H, m***)***, 3.28 (1H, dd, J 2.2 Hz, 7.0 Hz), 3.35-3.43 (3H, m); 13C NMR (CDCl3, 100 MHz)  14.47, 23.05, 26.15, 29.90, 31.99, 44.85, 45.49, 47.55, 54.39, 72.08, 72.48; m/z 201.1954 (expected 201.1967).

***1,4-Dibenzyl-2-hexoxymethyl-piperazine***

To a suspension of sodium hydride (134mg, 1.8 mmol) in ether at 0 C was added, dropwise, a solution of 1-4-dibenzyl-2-(hydroxymethyl) piperazine (0.5g, 1.6 mmol, see above for preparation) in ether (20 ml). The crude mixture was stirred for 30 minutes, then the 1-bromohexane (0.45ml, 1.8 mmol) was added dropwise at 0 C. The solution was allowed to warm to room temperature and the reaction mixture was stirred overnight. The crude mixture was washed with aqueous sodium hydrogen carbonate (220 ml) and brine (20 ml). The organic layer was dried over MgSO4 and the solvent was removed in vacuo to give pale yellow oil purified by column chromatography using petroleum ether: ethyl acetate (9:1) as eluent, to give 0.438 g (72%) as a colourless oil. 1H NMR (CDCl3, 300 MHz)  0.79 (3H, t, J 7 Hz), 1.11-1.27 (6H, m), 1.48 (2H, m), 2.10-2.23 (3H, m), 2.45-2.49 (1H, m), 2.59-2.69 (3H, m), 3.26-3.32 (3H, m), 3.36-3.47 (3H, m), 3.59 (1H, dd, J 4.3 Hz, 10 Hz), 4.00 (1H, d J 13.5 Hz), 7.24-32 (10H, m); 13C NMR (CDCl3, 100 MHz)  14.14 (CH), 23.02 (CH2), 26.23 (CH2), 29.95 (CH2), 32.06 (CH2), 51.12 (CH2), 53.25 (CH2), 56.80 (CH2), 60.10 (CH), 63.40 (CH2), 71.85 (CH2), 127.16 (CH), 127.36 (CH), 128.56 (CH), 129.53 (CH), 138.56 (C), 139.56 (C); m/z 381.2904 (expected 381.2906); Anal. Calcd. for C25H36N2O: C, 78.90; H, 9.53; N, 7.36%. Found C, 79.31; H, 10.50; N, 7.36%.

**Piperazine-2-carboxylic acid amide 1d**

A solution of 1,4-dibenzyl-piperazine-2-carboxylic acid amide (1g, 2.8mmol, see below for preparation) in ethanol (10 mL) was treated with 10% Pd/C under an H2 atmosphere overnight at room temperature. The mixture was filtered through celite before removing the solvent *in vacuo*, to give 350 mg (95%) of the title compound as a white powder. The material was used in the next step without purification. M.p. 144-145 C; 1H NMR (CDCl3, 300 MHz)  2.66-2.92 (5H, m), 3.10 (1H, dd, J 3.4 Hz, 12.2 Hz), 3.28 (1H, dd, J 3.5 Hz, 12.2 Hz), 5.47 (1H, br), 6.84 (1H, br); 13C NMR (CDCl3, 100 MHz)  45.69 (CH2) , 46.72 (CH2), 49.46 (CH2), 59.58 (CH), 175.34 (C=O); m/z 130.0983 (expected 130.0980).

**1,4-Dibenzyl-piperazine-2-carboxylic acid amide**

Prepared according to the procedure used by Rondu *et al:*1 3g of 2,3-dibromo propionamide (12.9 mmol) was added dropwise to a hot (80 C) toluene solution (75 ml) of *N, N’*-dibenzylethylenediamine 2.98g (12.4 mmol) and 4.24 ml of triethylamine. The reaction mixture was refluxed for 48 hours and then cooled. The crude mixture was washed with aqueous sodium hydrogen carbonate (250 ml) and brine (150 ml). The organic layer was dried over MgSO4 and the solvent was removed in vacuo to give a white powder purified by recrystalisation (dichloromethane –ether) 2.83g (74%). 1H NMR (CDCl3, 300 MHz)  2.25-2.42 (3H, m), 2.53-2.58 (1H, m), 2.73-2.78 (1H, m), 2.88 (1H, dd, J 2 Hz, 11 Hz), 3.14 (1H, dd, J 3.4 Hz, 7.7 Hz), 3.38-3.52 (3H, m), 3.81 (1H, d, J 13.6 Hz), 7.26-7.34 (10H, m); 13C NMR (CDCl3, 100 MHz)  49.73 (CH2), 52.86 (CH2), 56.09 (CH2), 60.43 (CH2), 63.18 (CH2), 66.13 (CH), 174.80 (C=O); m/z 310.1910 (expected 310.1919).

***Piperazine-2-carboxylic acid propylamide 1e***

A solution of 1,4-Dibenzyl-piperazine-2-carboxylic acid propylamide (1g, 2.8mmol, see below for preparation) in ethanol (10 mL) was treated with 10% Pd/C under an H2 atmosphere overnight at room temperature. The mixture was filtered through celite before removing the solvent *in vacuo*, to give 469 mg (96%) of the title compound as a white powder. The material was used in the next step without purification. M.p. 144-145 C; 1H NMR (CDCl3, 300 MHz)  0.90 (3H, t, J 7.5 Hz), 1.50 (2H, sextuplet, J 7.1 Hz), 2.67-2.94 (5H, m), 3.14-3.22 (3H, m), 3.30 (1H, dd, J 3.4 Hz, 8.5 Hz); 13C NMR (CDCl3, 100 MHz)  11.80 (CH3), 23.22 (CH2), 41.01 (CH2), 45.75 (CH2), 46.66 (CH2), 49.73 (CH2), 59.76 (CH), 172.51 (C=O); m/z 172.1440 (expected 172.1450).

**1,4-Dibenzyl-piperazine-2-carboxylic acid propylamide**

Prepared according to the procedure used by Le Bihan *et al*;[[2]](#endnote-3).65 ml of *n-*propylamine(7.8 mmol) in toluene (10ml) was added dropwise to a stirred and cooled solution of 7.8 ml of Al(CH3)3 (7.8 mmol) in toluene at 0 C, so that the temperature did not exceed 10 C. After 1 h, a solution of 2g of ethyl 1-4-dibenzyl-2-piperazinecarboxylate (5.9 mmol) in toluene (10 ml) was added slowly at room temperature. The reaction mixture was refluxed for 4 h, then stirred overnight at room temperature. The reaction mixture was cooled and treated dropwise with 50 ml of water/MeOH (50:50, v/v). After filtration, the crude mixture was extracted with dichloromethane (350 ml), washed with brine (230 ml) and water (20 ml) and dried over MgSO4. Evaporation of the solvents gives a waxy white solid, which was purified by column chromatography using petroleum ether: ethyl acetate (8:2) as eluent, to give 1.51 g (74%) of a white powder. Mp 119-120 C; 1H NMR (CDCl3, 300 MHz)  0.95 (3H, t, J 7.5 Hz, CH3), 1.56 (2H, sextuplet, J 7.1 Hz), 2.26-2.36 (3H, m), 2.39 (1H, d, J 1.9 Hz), 2.60 (1H, m), 2.62 (1H, d, J 3.5 Hz), 2.74-3.50 (6H, m) 3.81 (1H, d, J 13.5 Hz), 7.29-7.34 (10H, m); 13C NMR (CDCl3, 100 MHz)  11.95 (CH3), 23.41, 41.02, 50.04, 52.99, 56.55, 60.79, 63.18, 66.29 (CH), 127.70 (Ar), 128.83 (Ar), 129.11 (Ar), 129.62 (Ar), 137.86 (Ar), 138.34 (Ar), 172.08 (C=O); m/z 352.2381 (expected 352.2389); Anal. Calcd. for C22H29N3O: C, 75.18; H, 8.32; N, 11.96%. Found C, 75.00; H, 8.40; N, 12.01%.

**General procedure for photochemical addition of pierazines 1 to C60 to give adducts 2.**

A toluene solution (*ca.* 5ml) of the diamine (*ca.* 0.33 mmol) was added to a toluene solution (total volume 80 ml) of C60 (80 mg, 0.11 mmol). Following nitrogen-purging, the solution was irradiated for the appropriate period (see Table 1 in main text). The resulting product mixture was separated by flash silica column chromatography. C60 was eluted with a concentration gradient of hexane/toluene before the monoadducts were eluted with toluene/methanol (99:1). Elution with methanol gave no further products.Products were isolated as brown powders after removal of solvent *in vacuo*. Yields for various conditions are given in Table 1 of the main text.

**(2-methylpiperazine)-C60 adduct 2a**[[3]](#endnote-4)

Prepared from diamine **1a** and C60 by General Photochemical procedure described above. Irradiation period of 64 hours. Yield 41%.

1H NMR (CDCl3, 300 MHz)  1.78 (3H, d, J 6.8 Hz, CH3), 3.19 (1H, dd, J 6.4 Hz, 13.7Hz, H3ex), 3.57 (1H, dddd, J 4.0 Hz, 8.6 Hz, 8.6 Hz, 11.5 Hz, H5ex), 3.91 (1H, ddd, J 5.4 Hz, 8.6 Hz, 14.1 Hz, H6ex), 4.45-4.60 (2H, m, H5en+H6en), 4.72 (1H, m, H3en), 4.94 (1H, ddd, J 6.4 Hz, 6.8 Hz, 13.4 Hz, H2en); 13C NMR (CDCl3/CS2, 100 MHz) 19.48, 39.17, 47.08, 48.93, 55.11, 77.54, 80.53, 137.85, 137.97, 138.06, 138.28, 140.58, 140.65, 140.67, 141.72, 141.83, 141.93, 142.61, 142.64 (2C), 142.68 (2C), 143.01 (2C), 143.03, 143.42 (3C), 143.43 (3C), 143.48, 145.46 (2C), 145.51 (2C), 146.06 (3C), 146.08 (2C), 146.34 (2C), 146.42 (2C), 146.45, 146.67, 146.75, 146.79 (3C), 146.81 (2C), 146.92 (2C), 147.16 (2C), 147.18 (2C), 148.64, 148.67, 152.93, 153.20, 153.35, 153.53; m/z 818.

***(2-hydroxymethyl-piperazine)-C60 adduct 2b***

Prepared from diamine **1b** and C60 by the General Photochemical procedure described above:

1H NMR (CDCl3, 300 MHz) 2.77 (1H, br, OH), 3.10 (1H, dd, J 6.8 Hz, 13.4 Hz, H3ex), 3.52 (1H, m, H5ex), 3.85 (1H, ddd, J 5.3 Hz, 11.8 Hz, 14.5 Hz, H6ex), 4.11 (1H, m, CH2O), 4.25 (1H, dd, J 10 Hz, 10 Hz, CH2O), 4.42-4.54 (1H, m, H5/H6en), 4.54-4.68 (2H, H5/H6en+H3en), 5.11 (1H, m, H2en); 13C NMR (CDCl3/CS2, 100 MHz) 39.44, 47.54, 50.32, 54.98, 62.38, 78.40, 80.04, 137.20 (2C), 137.33 (2C), 137.65, 137.78 (2C), 140.01, 140.08 (2C), 140.14 (2C), 140.15, 141.07 (2C), 141.17 (2C), 141.29, 142.02, 142.11(2C), 142.46, 142.88 (2C), 142.90, 142.95, 144.82 (2C), 144.92, 145.41, 145.46, 145.56, 145.63 (2C), 145.70 (2C), 145.87 (2C), 145.89, 145.93 (2C), 146.00 (2C), 146.33 (3C), 146.40, 146.64 (4C), 146.67 (2C), 151.03 (2C), 151.38, 151.76, 151.91; m/z 834 (MH+, expected 834.08).

***(2-(hexoxymethyl)-piperazine)-C60 adduct 2c***

Prepared from diamine **1c** and C60 by the General Photochemical procedure described above:

1H NMR (CDCl3, 300 MHz)  0.89 (3H, t, J 7.1 Hz, CH3), 1.29 (2H, br s, CH2), 1.45 (6H, br s, 3CH2), 3.31 (1H, dd, J 7 Hz, 14 Hz, H3ex), 3.57 (1H, ddd, J 4.8 Hz, 8.91 Hz, 14.9 Hz, H5ex), 3.84 (1H, ddd, J 5.27 Hz, 11.55 Hz, 14.6 Hz, H6ex), 3.97 (2H, s, OCH2[Hexyl]), 4.52-4.61 (2H, m, H5/6en), 4.70 (1H, m, H3en), 4.73 (1H, dd, J 6 Hz, 11.5 Hz, CH2O), 4.93 (1H, dd, J 7.6 Hz, 11.5 Hz, CH2O), 5.14 (1H, m, H2en); 13C NMR (CDCl3/Cs2, 100 MHz)  14.38, 23.02, 25.65, 29.85, 31.95, 40.75, 47.43, 50.48, 52.65, 66.40, 77.41, 78.06, 136.78, 137.16, 139.54, 139.59, 139.68, 139.72, 140.59, 140.82 (2C), 141.58, 141.61, 141.64, 141.68, 142.00 (2C), 142.03, 142.40, 142.42 (2C), 142.43, 142.45 (2C), 144.36 (2C), 144.40, 144.94, 144.96, 145.07 (4C), 145.11, 145.28 (2C), 145.38, 145.41, 145.43, 145.49 (2C), 145.53 (3C), 145.55, 145.83 (3C), 145.86 (3C), 146.18 (2C), 146.21 (3C), 147.69, 147.73, 150.65; m/z 919 (MH+, expected 919.2).

***(Piperazine-2-carboxylic acid amide)-C60 adduct 2d***

Prepared from diamine **1d** and C60 by the General Photochemical procedure described above:

1H NMR (CDCl3, 300 MHz)  3.47-3.74 (2H, m, H4ex+H5ex), 4.10 (1H, dd, J 7 Hz, 14 Hz, H3en), 4.22 (1H, dd, J 7.2 Hz, 14.4 Hz, H3ex), 4.41-4.48 (1H, m, H5/H6en), 4.53-4.62 (2H, m, H5/H6en +NH2), 5.28-5.35 (1H, m, H3en), 5.78 (1H, br, NH); 13C NMR (CDCl3/Cs2, 100 MHz)  41.23, 42.68, 47.74, 49.31, 78.28, 79.07, 136.96, 137.03, 137.78, 137.85, 139.92, 140.04, 140.20, 140.28, 141.03, 141.11, 141.39, 141.41, 142.00, 142.05, 142.11, 142.18, 142.36, 142.42, 142.48, 142.52, 142.90 (3C), 142.92, 142.95 (2C), 144.69, 144.80, 144.87, 145.02, 145.36, 145.43, 145.56 (2C), 145.58, 145.76, 145.86 (2C), 145.90, 146.03 (2C), 146.30, 146.33 (2C), 146.36, 146.63, 146.65, 146.71 (2C), 148.14, 145.25, 150.57, 150.82, 151.76, 15194, 173.77; m/z 849 (MH+, expected 848.1).

***(Piperazine-2-carboxylic acid propylamide)-C60 adduct 2e***

Prepared from diamine **1e** and C60 by the General Photochemical procedure described above.

1H NMR (CDCl3, 300 MHz)  1.08 (3H, t, J 7.3 Hz, CH3), 1.72 (2H, sextuplet, J 7.4, CH2), 3.43 (1H, q, J 6.5 Hz, NCH2), 3.49-3.65 (3H, m, NCH2+ H5/H6ex), 4.25 (1H, dd, J 6.8 Hz, 13.9 Hz, H3ex), 4.37-4.43 (1H, m, H5/H6en), 4.54-4.64 (2H, m, H5/H6en + H3en), 5.31 (1H, t, J 7.7 Hz, H2en); 13C NMR (CDCl3/CS2, 100 MHz)  11.74, 23.3, 41.43, 42.12, 46.85, 48.03, 56.71, 77.29, 78.19, 136.97, 137.03, 137.78, 137.84, 139.91, 140.03, 140.19, 140.27, 141.03, 141.10, 141.38, 141.41, 141.99, 142.04, 142.11, 142.17, 142.36, 142.41, 142.46, 142.51, 142.89 (2C), 142.91, 142.94 (2C), 144.69, 144.79, 144.85, 145.01, 145.36, 145.42, 145.55 (2C), 145.58, 145.89, 146.02 (2C), 146.04 (2C), 146.29, 146.35, 146.62, 146.64, 146.70 (2C), 148.14, 148.25, 150.57, 150.82, 151.74, 151.92, 170.58; m/z 890 (MH+, expected 890.1).

***(Trans-2,5-dimethyl-piperazine)-C60 adduct 2f***

Prepared from diamine **1f** and C60 by the General Photochemical procedure described above, but using 5 equivalents of diamine (0.55 mmol).

1H NMR (CDCl3, 300 MHz) 1H NMR (CDCl3, 300 MHz)  1.82 (3H, d, J 6.9 Hz, CH3ex), 1.97 (3H, d, J 7.1 Hz, CH3en), 3.25 (1H, dd, J 4.8 Hz, 13.9 Hz, H3ex), 3.82 (1H, dd**,** J 8 Hz, 9 Hz, H5ex), 4.15 (1H, dd, J 9.3 Hz, 14.6 Hz, H6ex), 4.43 (1H, ddd, J 1.32 Hz, 9.5 Hz, 14.6 Hz, H6en), 4.76 (1H, m, H2en), 5.03 (1H, ddd, J 0.88 Hz, 9.3 Hz, 13.9 Hz, H3en); 13C NMR (CDCl3/CS2, 100 MHz)  20.96, 23.71, 47.36, 49.70, 54.46, 60.03, 77.23, 77.36 (part. obsc.), 136.64, 137.38 (2C), 137.42, 139.80, 139.86, 139.87, 140.02, 140.63, 140.82, 140.95, 141.23, 141.84, 141.91, 141.97, 142.03, 142.34, 142.37, 142.39, 142.72, 142.73, 142.77, 142.94, 142.99, 143.04, 144.64, 144.67, 144.91, 145.00, 145.32, 145.38, 145.41, 145.42, 145.44, 145.45, 145.50, 145.59, 145.66, 145.77 (2C), 145.80, 145.83, 145.85, 146.13 (2C), 146.20 (2C), 146.42, 146.54 (2C), 146.56 (2C), 148.03, 148.07, 151.86, 152.09, 153.33, 153.46; m/z 833 (MH+, expected 833.1).

**Piperazine-C60­ adduct 2h**

Prepared from piperazine and C60 by the General Photochemical procedure described above, but using only 1 equivalent of diamine (0.11 mmol). Irradiation period of 18 hours. Yield 75%. Spectroscopic data in line with literature.[[4]](#endnote-5)

1. F. Rondu, G. Le Bihan, X. Wang, A. Lamouri, E. Touboul, G. Dive, T. Bellahsene,

   B. Pfeiffer, P. Renard, B. Guardiola Lemaitre, D. Manechez, L. Penicaud, A. Ktorza, JJ. Godfroid, *Journal of Medicinal Chemistry*, 1997, **43**, 3793. [↑](#endnote-ref-2)
2. G. Bihan, F. Rondu, A. Pelé-Tounian, X. Wang, S. Lidy, E. Touboul, A. Lamouri, G. Dive, J. Huet, B. Pfeiffer, P. Renard, B. Guardiola-Lemaître, D. Manéchez, L. Pénicaud, Al. Ktorza, and JJ. Godfroid, *Journal of Medicinal Chemistry*, 1999, **42**, 1587. [↑](#endnote-ref-3)
3. C. P. Butts, R. W. A. Havenith, M. Jazdzyk, T. Drewello and S. Kotsiris, *Tetrahedron Lett.*, 2003, **44**, 3565. [↑](#endnote-ref-4)
4. A. Hirsch, Q. Li and F. Wudl, *Angew. Chem. Int. Ed. Engl.*, 1991, **30**, 1309. [↑](#endnote-ref-5)
